# Supplementary material for: Low temperature decomposition of ozone by facilely synthesized cuprous oxide catalyst
Source: Royal Society of Chemistry journal article supplement (doi:10.1039/c7nj00253j), 2017-01-01
Supplement: c7nj00253j1.pdf [file c7nj00253j1.pdf]

**Supporting Information.** (To be published in New Journal of Chemistry.)

**Low temperature Decomposition of Ozone by Facilely Synthesized Cuprous Oxide Catalyst**

Shuyan Gong<sup>a,b</sup>, Wenhui Li<sup>a,b</sup>, Zheng Xie<sup>a</sup>, Xiang Ma<sup>a,b</sup>, Haidi Liu<sup>a</sup>, Ning Han<sup>a,c,\*</sup>, Yunfa Chen<sup>a,c,\*</sup>

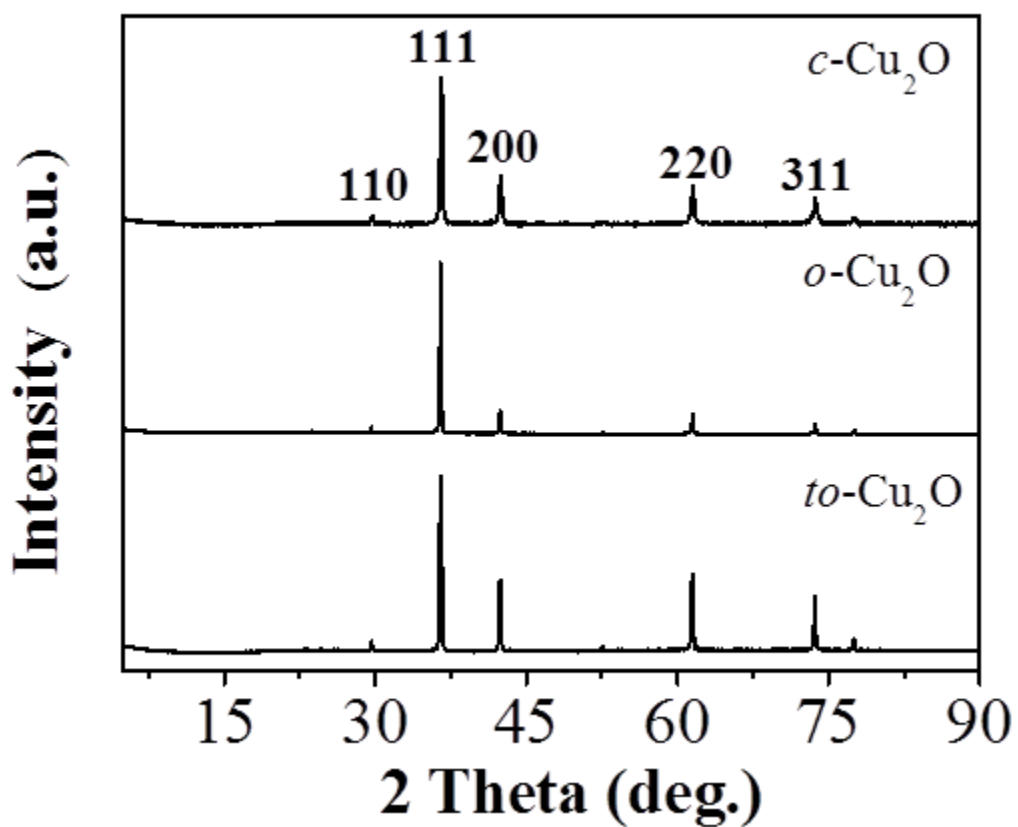

Figure S1. XRD patterns of Cu<sub>2</sub>O crystals synthesized with various morphologies

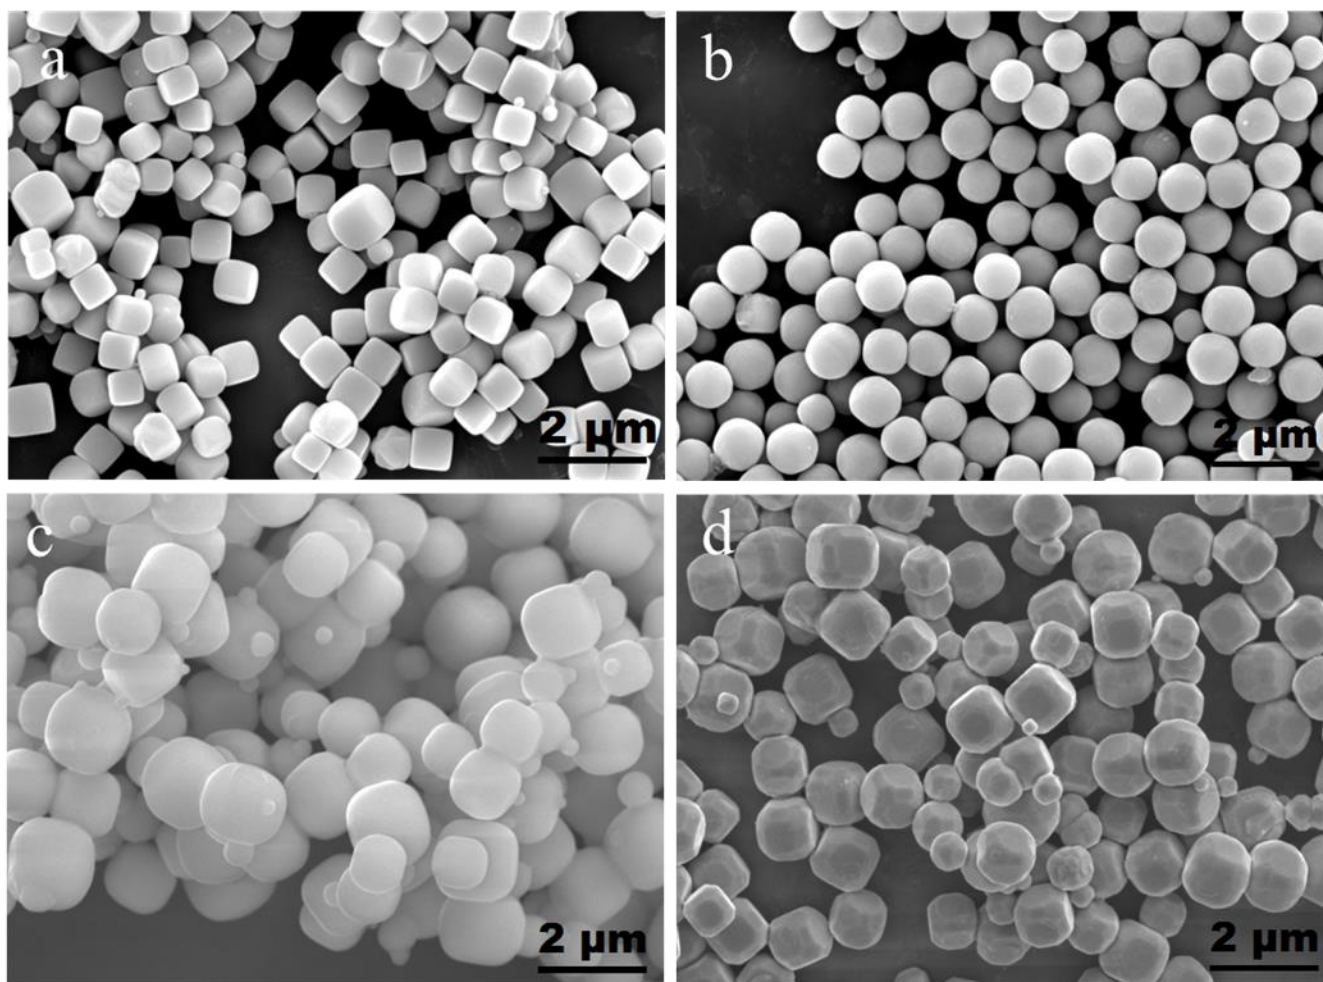

Figure S2. SEM images of the Cu<sub>2</sub>O crystals synthesized with different PVP mass and AA adding rate: (a) 0.2 g, dumping (b) 1 g, dumping (c) 0 g, 0.20 ml min<sup>-1</sup> (d) 0 g, 0.40 ml min<sup>-1</sup>.

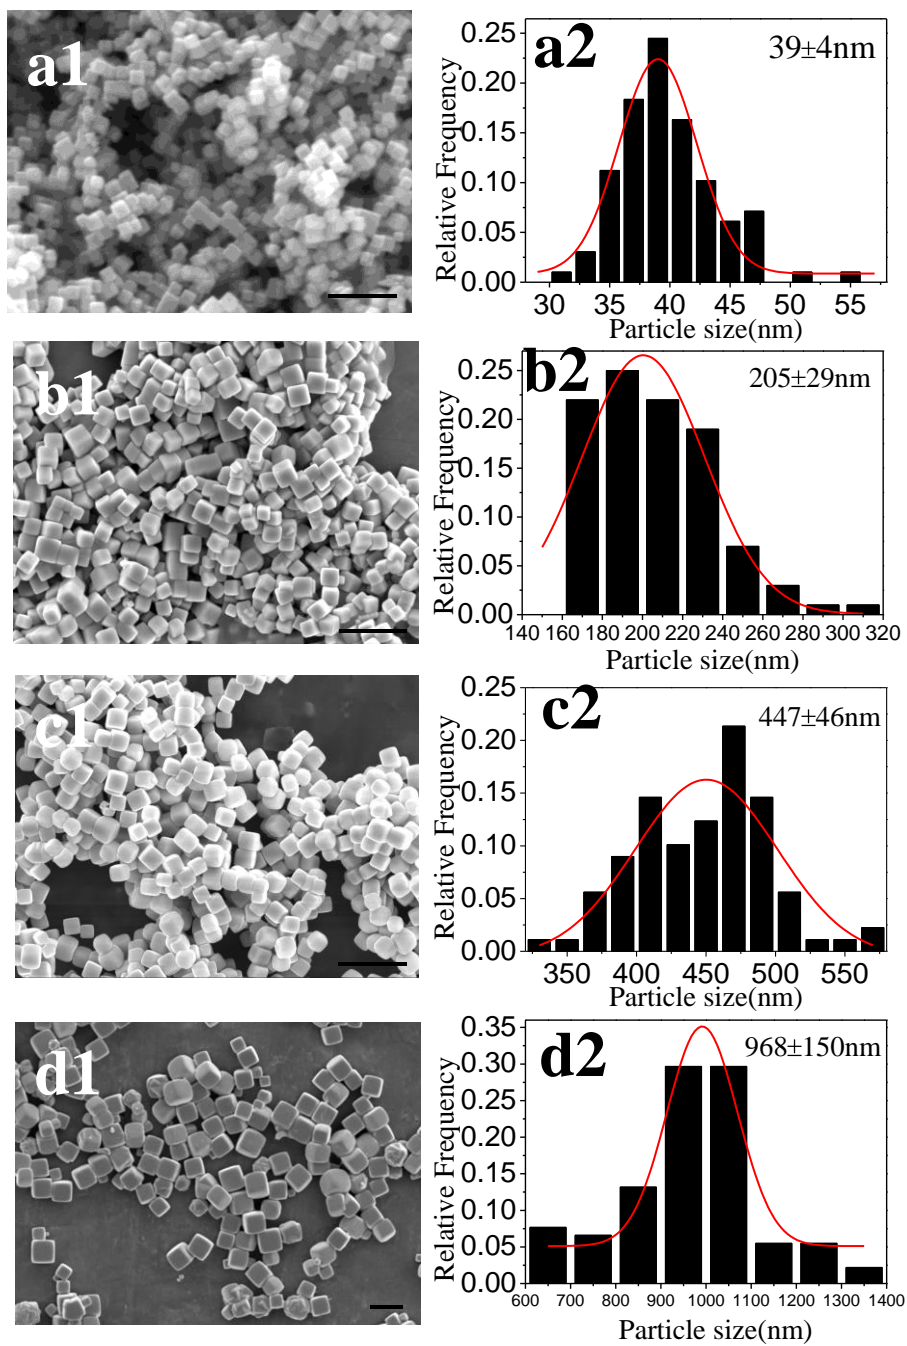

Figure S3. SEM images of the cube  $\text{Cu}_2\text{O}$  crystals synthesized with various size (a1-d1) and corresponding size distribution histograms (a2-d2)

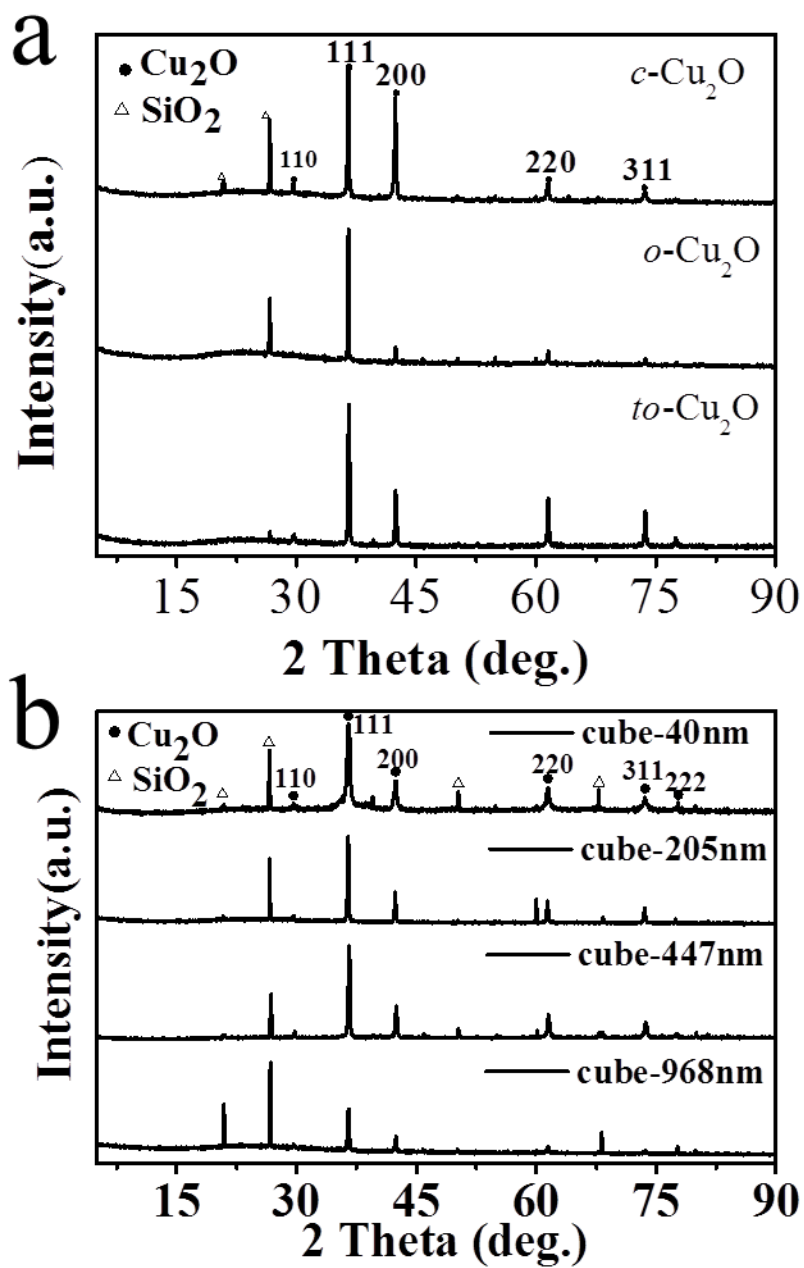

Figure S4. XRD patterns of  $\text{Cu}_2\text{O}$  crystals synthesized with various morphologies (a) and cubic  $\text{Cu}_2\text{O}$  with different size (b) after ozone test

The XRD peaks of  $\text{SiO}_2$  in used catalysts originate from mixed quartz sand support.

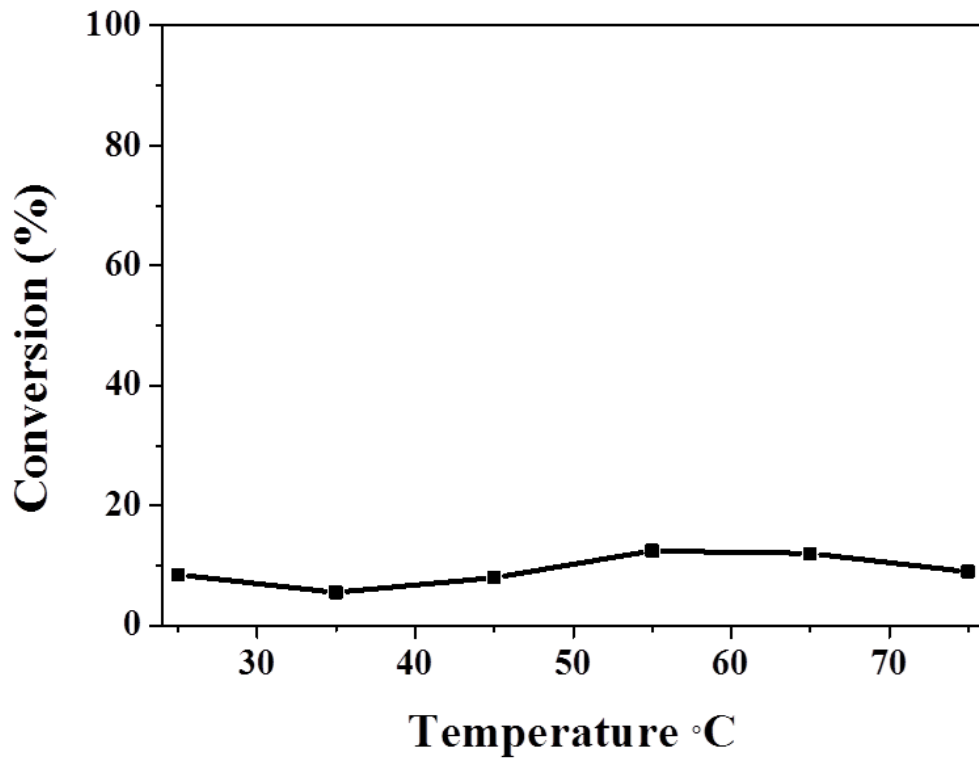

Figure S5. Ozone conversion as a function of temperature over quartz sand. (Ozone inlet concentration 20 ppm, SV 60000 ml g<sup>-1</sup> h<sup>-1</sup>.)
